# Supplementary material for: Association between antibiotic consumption and the rate of carbapenem-resistant Gram-negative bacteria from China based on 153 tertiary hospitals data in 2014
Source: Springer Nature journal article supplement (doi:10.1186/s13756-018-0430-1), 2018-11-19
Supplement: MOESM1 [file 16279944]

### Details of participating hospitals

| Hospital number | Area    | Open beds | Annual discharge(thousands people) |
|-----------------|---------|-----------|------------------------------------|
| 1               | Central | 3000      | 6                                  |
| 2               | Central | 3000      | 7.5                                |
| 3               | Central | 3900      | 17                                 |
| 4               | Central | 3540      | 13.7                               |
| 5               | Central | 1400      | 5.9                                |
| 6               | Central | 4000      | 8                                  |
| 7               | Central | 4000      | 10                                 |
| 8               | Central | 5000      | 22.7                               |
| 9               | Central | 2200      | 7                                  |
| 10              | Central | 1850      | 5                                  |
| 11              | Central | 2356      | 13.5                               |
| 12              | Central | 1800      | UN                                 |
| 13              | Central | 3500      | 18                                 |
| 14              | Central | 2100      | 7.13                               |
| 15              | Central | 2300      | 7.2                                |
| 16              | Central | 3400      | 7.6                                |
| 17              | Central | 2442      | 9                                  |
| 18              | Central | 8475      | 41                                 |
| 19              | Central | 3051      | 10.92                              |
| 20              | Central | 3500      | 14.8                               |
| 21              | Central | 1874      | UN                                 |
| 22              | Central | 3195      | 13                                 |
| 23              | East    | 5450      | 19.35                              |
| 24              | East    | 4825      | 24.6                               |
| 25              | East    | 2464      | 11.3                               |
| 26              | East    | 2398      | 8                                  |
| 27              | East    | 2800      | 9.4                                |
| 28              | East    | 2335      | 10                                 |
| 29              | East    | 2631      | 8                                  |
| 30              | East    | 2000      | 5.5                                |
| 31              | East    | 3300      | 19.2                               |
| 32              | East    | 3685      | 6.5                                |
| 33              | East    | 1705      | 3.5                                |
| 34              | East    | 2475      | 10                                 |
| 35              | East    | 2900      | 14.3                               |
| 36              | East    | 1226      | 4                                  |
| 37              | East    | 3000      | 10.08                              |
| 38              | East    | 2514      | 11                                 |
| 39              | East    | 1000      | 3                                  |
| 40              | East    | 3500      | 14                                 |

|    |           |      |      |
|----|-----------|------|------|
| 41 | East      | 2813 | 5    |
| 42 | East      | 2000 | 7    |
| 43 | East      | 2100 | 10   |
| 44 | East      | 1950 | 10.1 |
| 45 | East      | 2458 | 11.6 |
| 46 | East      | 3000 | 14.4 |
| 47 | East      | 1903 | 6    |
| 48 | East      | 6000 | 20   |
| 49 | East      | 2500 | 13.1 |
| 50 | East      | 2400 | 7.5  |
| 51 | East      | 2685 | 9.43 |
| 52 | North     | 1574 | 8.5  |
| 53 | North     | 1720 | 8.2  |
| 54 | North     | 1006 | UN   |
| 55 | North     | 3000 | 4.5  |
| 56 | North     | 2000 | 9.5  |
| 57 | North     | 1247 | 2    |
| 58 | North     | 2402 | 7.12 |
| 59 | North     | 2000 | 6    |
| 60 | North     | 1670 | 6    |
| 61 | North     | 1852 | UN   |
| 62 | North     | 2816 | 15   |
| 63 | North     | 1863 | 10.9 |
| 64 | North     | 2000 | 15   |
| 65 | North     | 1300 | 4    |
| 66 | North     | 1000 | 3    |
| 67 | North     | 3092 | 10   |
| 68 | North     | 3000 | 10   |
| 69 | North     | 2000 | 5.4  |
| 70 | North     | 1800 | 4    |
| 71 | North     | 1500 | 5    |
| 72 | North     | 1500 | UN   |
| 73 | North     | 1900 | 8.9  |
| 74 | North     | 803  | 1.8  |
| 75 | North     | 1159 | 5    |
| 76 | North     | 1500 | 5    |
| 77 | North     | 1800 | 6.45 |
| 78 | North     | 2468 | 5.5  |
| 79 | North     | 743  | 1    |
| 80 | North     | 1610 | 5    |
| 81 | Northeast | 1208 | 3.4  |
| 82 | Northeast | 2350 | 8.41 |
| 83 | Northeast | 3700 | 10   |

|     |           |      |       |
|-----|-----------|------|-------|
| 84  | Northeast | 2000 | 7.47  |
| 85  | Northeast | 1450 | 2.2   |
| 86  | Northeast | 1216 | 6     |
| 87  | Northeast | 2005 | 15    |
| 88  | Northeast | 6000 | 20    |
| 89  | Northeast | 2800 | UN    |
| 90  | Northeast | 6496 | 26.6  |
| 91  | Northeast | 1804 | 6.97  |
| 92  | Northeast | 2950 | 11.5  |
| 93  | Northeast | 2600 | 9.6   |
| 94  | Northeast | 3257 | 26.7  |
| 95  | Northeast | 1698 | UN    |
| 96  | Northeast | 1300 | 4     |
| 97  | Northeast | 6500 | 23.6  |
| 98  | Northwest | 3200 | 14.03 |
| 99  | Northwest | 2245 | 4     |
| 100 | Northwest | 3500 | 11.01 |
| 101 | Northwest | 2686 | 7.5   |
| 102 | Northwest | 2400 | 9.05  |
| 103 | Northwest | 1200 | UN    |
| 104 | Northwest | 3684 | 12.48 |
| 105 | Northwest | 2000 | 6.1   |
| 106 | Northwest | 2600 | 5.78  |
| 107 | Northwest | 1600 | 6.2   |
| 108 | Northwest | 3000 | 11.6  |
| 109 | Northwest | 2000 | 6.48  |
| 110 | Northwest | 1725 | 9     |
| 111 | Northwest | 2541 | 11.09 |
| 112 | Northwest | 2700 | 15    |
| 113 | Northwest | 3000 | 14    |
| 114 | Southern  | 1206 | 4     |
| 115 | Southern  | 2852 | 11.06 |
| 116 | Southern  | 1371 | 6.28  |
| 117 | Southern  | 837  | 2     |
| 118 | Southern  | 2750 | 10    |
| 119 | Southern  | 2117 | 7.95  |
| 120 | Southern  | 2490 | 8.75  |
| 121 | Southern  | 720  | 1.2   |
| 122 | Southern  | 1000 | 4.5   |
| 123 | Southern  | 1057 | 3.5   |
| 124 | Southern  | 1950 | 4.6   |
| 125 | Southern  | 1800 | 4.5   |
| 126 | Southern  | 3000 | 8.5   |

|     |           |      |       |
|-----|-----------|------|-------|
| 127 | Southern  | 1462 | 4.4   |
| 128 | Southern  | 2000 | 8     |
| 129 | Southern  | 3095 | 12.4  |
| 130 | Southern  | 2225 | 10.43 |
| 131 | Southern  | 1300 | UN    |
| 132 | Southern  | 1800 | 6.4   |
| 133 | Southern  | 2500 | 10.1  |
| 134 | Southern  | 2179 | 10    |
| 135 | Southern  | 2818 | 11.34 |
| 136 | Southern  | 1800 | 5.4   |
| 137 | Southern  | 2850 | 10.61 |
| 138 | Southern  | 3200 | 13.1  |
| 139 | Southern  | 1500 | 5     |
| 140 | Southwest | 2860 | 12    |
| 141 | Southwest | 2900 | 13.2  |
| 142 | Southwest | 3000 | 10    |
| 143 | Southwest | 3000 | 9.2   |
| 144 | Southwest | 2100 | UN    |
| 145 | Southwest | 1500 | 4.58  |
| 146 | Southwest | 4000 | 15    |
| 147 | Southwest | 4200 | 12    |
| 148 | Southwest | 1500 | 9     |
| 149 | Southwest | 4300 | 24.32 |
| 150 | Southwest | 4123 | UN    |
| 151 | Southwest | 1000 | 2.2   |
| 152 | Southwest | 1380 | 4.5   |
| 153 | Southwest | 3200 | 14    |

UN: unknown
